# Supplementary material for: Fluorescence and physical characterization of sol–gel-derived nanocomposite films suitable for the entrapment of biomolecules
Source: Royal Society of Chemistry journal article supplement (doi:10.1039/b204547h), 2002-01-01
Supplement: b204547h.doc [file b204547h.doc]

**SUPPLEMENTARY MATERIAL**

**Fluorescence and Physical Characterization of Sol-Gel-Derived Nanocomposite Films Suitable for the Entrapment of Biomolecules**

Gillian Goring and John D. Brennan*

Department of Chemistry, McMaster University, Hamilton, Ontario, L8S 4M1, Canada

**Table S1.** Gelation time of silane mixtures used to produce thin films.

| Silane composition | pH 4.00a  TRIS/Phos | pH 5.50a  TRIS/Phos | pH 7.26a  TRIS/Phos | pH 8.5a  TRIS/Phos | pH 10a  TRIS/Phos |
| --- | --- | --- | --- | --- | --- |
| TEOSb | >24 hr/24hr+ | >24 hr /16hr | **160minb**/4.5min | 5.0min/4.0min | 3.0min/2.0min |
| 10% MTES | >24 hr/>24 hr | >24 hr/>24 hr | >24 hr/11.0min | 13.0min/8.0min | 6.0min/8.5min |
| **20% MTESb** | >24 hr/>24 hr | >24 hr/>24 hr | **120minb**/31min | 32min/16min | 13.5min/13min |
| 40% MTES | >24 hr/>24 hr | >24 hr/>24 hr | >24 hr/60min | 120min/30min | 25min/40min |
| 2% DMDMS | >24 hr/>24 hr | >24 hr/>24 hr | >24 hr/8.0min | 5.5min/3.0min | 3.0min/3.5min |
| **10% DMDMSb** | >24 hr/>24 hr | >24 hr/18hr | **90minb**/4.0min | 11.0min/3.0min | 5.5min/<2.00min |
| 20% DMDMS | >24 hr/>24 hr | >24 hr/>24 hr | >24 hr/6.0min | 7.0min/5.0min | 4.0min/4.0min |

a Errors on the pH range: pH 4.00  0.05; pH 5.50  0.10; pH 7.26  0.03; pH 8.50  0.10;

pH 10.00  0.05, TRIS is tris buffer, Phos is phosphate buffer

b Boldface values show the compositions used to form the films that were studied in this paper.
